# Supplementary material
Source: ML conference proceedings conference paper supplement (https://openaccess.thecvf.com/content/CVPR2022/html/Xu_AME_Attention_and_CVPR_2022_paper.html)
Supplement: Supplementary file 1 [file Xu_AME_Attention_and_CVPR_2022_supplemental.pdf]

# AME: Attention and Memory Enhancement in Hyper-Parameter Optimization

## Supplementary Material

### A. Preliminary Knowledge

AME employs ASHA as the trial scheduler by default, but it is also able to be combined with Hyperband (see Tab. 3). Next, we will briefly introduce these schedulers, including SHA [23, 25], ASHA [32] and Hyperband [31].

**Successive Halving Algorithm (SHA).** The central idea of SHA (see Alg. I) is to compare the performance of  $n$  trials set by different hyper-parameter configurations under finite total budget  $B$  in each rung  $t$ , discarding the poorly performing trials and leaving  $n_t/\eta$  high-performance ones. The time interval  $r_t$  between two rungs increases exponentially. After several repetitions, only the best configuration  $h^*$  is left. Since low-performance trials are stopped early, the actual budget consumed by each trial is unequal. The sum of the actual budget of all  $n$  trials should be equal to the total budget  $B$ .

**Asynchronous SHA (ASHA).** ASHA is an asynchronous parallel SHA. The selection of candidates for the next rung is performed while the training or evaluation of other networks in current rung is in progress. Intuitively, as long as the evaluation indicator of one trial in a certain rung is greater than the corresponding threshold, ASHA will promote it to the next rung for training instead of waiting for the evaluation in the whole rung to be completed. In addition, the thresholds of each rung are recalculated based on the newly obtained evaluation indicators. Note that the RunReturnValLoss() subroutine (see Alg. I) in ASHA is asynchronous, which accelerates the speed of SHA.

**Hyperband.** Hyperband (see Alg. II) aims to make a trade-off between  $n$  (exploration) and  $B/n$  (exploitation) by repeatedly calling SHA. In the early stage, the scheduler needs to explore as many new configurations as possible; in the later stage, it gradually focuses on high-performance trials. Note that the later trials are selected from the previous ones. Hyperband is a two-layer loop, one layer is to choose different combinations of  $(n, r)$ , and the other is to perform SHA for each combination. In each loop of different combinations of  $(n, r)$ , configurations to be evaluated decrease and the budget for each configuration increases.

---

#### Algorithm I SHA / ASHA

---

**Input:** Maximum Budget  $R$ , Minimum Budget  $r$ , Maximum Number of Configurations  $n$ , Reduction Factor  $\eta$ , Minimum Early-Stopping Rate  $s$ , Search Space  $\mathcal{H}$ .

**Output:** Best Configuration  $h^*$

```

1:  $s_{\max} = \lfloor \log_{\eta} (R/r) \rfloor$ ,
2:  $H = \text{CONFIGURATIONSAMPLING}(n, \mathcal{H})$ 
3: for  $t \in \{0, 1, \dots, s_{\max} - s\}$  do // All configurations
   trained for a given  $t$  constitute a rung.
4:    $n_t = \lfloor n\eta^{-t} \rfloor, r_t = r\eta^{t+s}$ 
5:    $L = \text{RUNRETURNVALLOSS}(h, r_t) : h \in H$ 
6:    $H = \text{GETTOPK}(H, L, n_t/\eta)$ 
7: end for
8: return Best Configuration  $h^* \in H$ 

```

---



---

#### Algorithm II Hyperband

---

**Input:** Maximum Budget  $R$ , Minimum Budget  $r$ , Maximum Number of Configurations  $n_{\max}$ , Reduction Factor  $\eta$ , Search Space  $\mathcal{H}$ .

**Output:** Best Configuration  $h^*$

```

1:  $s_{\max} = \lfloor \log_{\eta} n_{\max} \rfloor, t_{\max} = \lfloor \log_{\eta} (R/r) \rfloor$ ,
2:  $s_0 = t_{\max} - s_{\max}$ 
3:  $H = \text{CONFIGURATIONSAMPLING}(n_{\max}, \mathcal{H})$ 
4: for  $s \in \{s_{\max}, s_{\max} - 1, \dots, 0\}$  do
5:    $n = \lfloor \frac{s_{\max} + 1}{s + 1} \eta^s \rfloor, r = R\eta^{-(s+s_0)}$ 
6:    $H_s = \text{CONFIGURATIONSAMPLING}(n, H)$ 
7:   for  $t \in \{0, 1, \dots, s + s_0\}$  do // Call SHA.
8:      $n_t = \lfloor n\eta^{-t} \rfloor, r_t = r\eta^t$ 
9:      $L = \text{RUNRETURNVALLOSS}(h, r_t) : h \in H_s$ 
10:     $H_s = \text{GETTOPK}(H_s, L, n_t/\eta)$ 
11:   end for
12: end for
13: return Best Configuration  $h^* \in H$ 

```

---

### B. Experimental Details

The supplementary results are shown in Fig. I, II, III, IV. The complete AME algorithm is shown in Alg. III. Examples of searched configurations are shown in Tab. I.

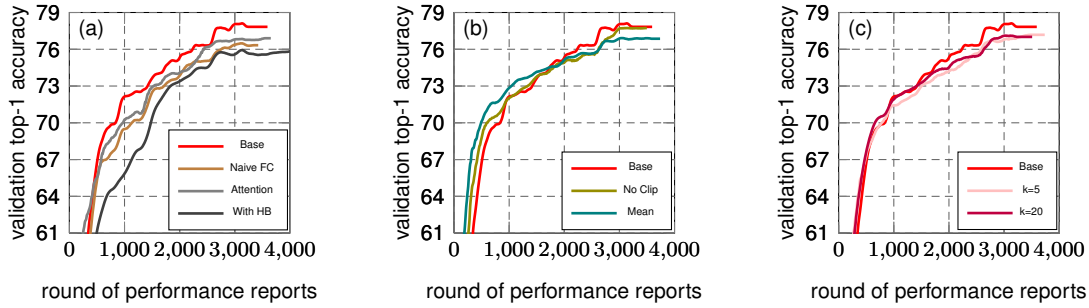

Figure III. Performance comparison in ablation studies of AME (C100). (a) Results in Tab. 3. (b) Results in Tab. 5. (c) Results in Tab. 6. Base: AME algorithm with default settings, described in Sec. 4.1. Carry on to Fig. 5 in the main text.

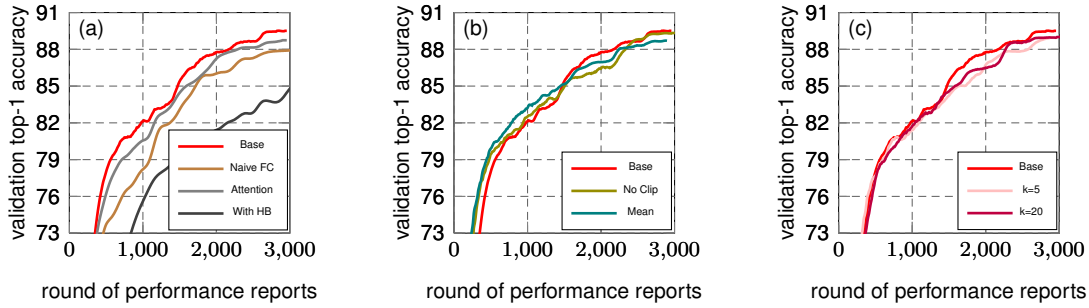

Figure IV. Performance comparison in ablation studies of AME (Cars). (a) Results in Tab. 3. (b) Results in Tab. 5. (c) Results in Tab. 6. Base: AME algorithm with default settings, described in Sec. 4.1. Carry on to Fig. 5 in the main text.

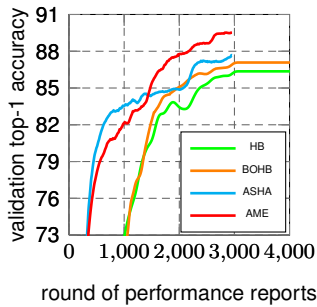

Figure I. Performance comparison of four algorithms in Stanford Cars. Carry on to Fig. 3 in the main text.

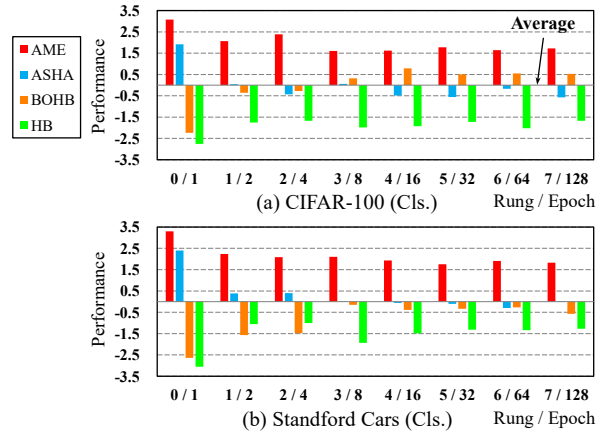

Figure II. Performance comparison of four algorithms in each rung. The bar charts represent the difference of each method relative to the average. Carry on to Fig. 4 in the main text.

---

**Algorithm III** Attention and Memory Enhancement (AME)

---

**Input:** Configuration Search Space  $\mathcal{H}$ , Evaluated Configuration Set  $\mathcal{H}_E$ , Unevaluated Configuration Set  $\mathcal{H}_U$ , Trial (Network)  $f_h$  with Hyper-parameter Configuration  $h$ , Configuration with Evaluation Indicator  $\hat{h}$ .

**Output:** Best Configuration  $h^*$

```
1: function TRIALSCHEDULER( $f_h$ ) // Queue for trials in running  $Q_R$ , Queue for trials in termination  $Q_T$ .
2:   if Start a new trial then
3:     CONFSEARCHER(Need a new configuration)
4:     Get  $h$  from  $\mathcal{H}_U$ . Move  $f_h$  to  $Q_R$ .
5:   else if  $f_h$  is evaluated with good performance then
6:     Add  $\hat{h}$  in  $\mathcal{H}_E$ . Move  $f_h$  to  $Q_R$ .
7:     CONFSEARCHER(Get an evaluated conf.)
8:   else if  $f_h$  is evaluated with bad performance then
9:     Add  $\hat{h}$  in  $\mathcal{H}_E$ . Move  $f_h$  to  $Q_T$ .
10:    CONFSEARCHER(Get an evaluated conf.)
11:   end if
12: end function
13: function CONFSEARCHER( $\cdot$ ) // Reward  $\mathcal{R}$ , Action  $\mathcal{A}$ , State  $\mathcal{S}$ , The number of input conf.  $k$ , A constant  $\rho$ .
14:   if Need a new configuration then
15:     if  $|\mathcal{H}_E| \leq \rho k$  ( $\rho \geq 1$ ) then
16:       Randomly sample  $h$  from  $\mathcal{H}$ . Add  $h$  to  $\mathcal{H}_U$ .
17:     else
18:       Randomly sample  $\hat{h}_1, \hat{h}_2, \dots, \hat{h}_k$  from  $\mathcal{H}_E$ .
19:        $h = g_{ag}(\{\hat{h}_1, \hat{h}_2, \dots, \hat{h}_k\})$ . Add  $h$  to  $\mathcal{H}_U$ .
20:     end if
21:   else if Get an evaluated conf. &  $|\mathcal{H}_E| > \rho k$  then
22:     Randomly sample  $\hat{h}_0, \hat{h}_1, \dots, \hat{h}_k$  from  $\mathcal{H}_E$ .
23:     Calculate  $\mathcal{R}$  with  $h_0$  as  $\mathcal{A}$ ,  $\hat{h}_1, \hat{h}_2, \dots, \hat{h}_k$  as  $\mathcal{S}$ .
24:     Training Agent with loss  $\mathcal{L}_{ag}$ .
25:   end if
26: end function
27: // The traversal order is roughly summarized:
28: for Every trial  $f_h$  in each rung do
29:   TRIALSCHEDULER( $f_h$ )
30: end for
31: return Best Configuration  $h^* \in \mathcal{H}_E$ .
```

---

| Task       | Methods   | Head        | Backbone  | Optimizer | LR    | WD     | BS |
|------------|-----------|-------------|-----------|-----------|-------|--------|----|
| CLS (C10)  | PBT       | -           | -         | -         | 0.043 | 6.8e-4 | -  |
|            | PB2       | -           | -         | -         | 0.008 | 4.6e-4 | -  |
|            | BayesOpt  | -           | -         | -         | 0.016 | 1.6e-4 | -  |
|            | Dragonfly | -           | -         | -         | 0.043 | 2.7e-4 | -  |
|            | ZOOpt     | -           | -         | -         | 0.073 | 8.0e-5 | -  |
|            | Hyperband | -           | ResNet34  | Adamax    | 0.001 | 5.0e-4 | 52 |
|            | BOHB      | -           | ResNet18  | Adam      | 0.001 | 0      | 28 |
|            | ASHA      | -           | ResNet34  | Adamax    | 0.005 | 0      | 32 |
|            | AME(Ours) | -           | ResNet34  | SGD       | 0.045 | 5.0e-4 | 16 |
| CLS (C100) | PBT       | -           | -         | -         | 0.072 | 2.2e-4 | -  |
|            | PB2       | -           | -         | -         | 0.017 | 6.6e-4 | -  |
|            | BayesOpt  | -           | -         | -         | 0.037 | 1.2e-4 | -  |
|            | Dragonfly | -           | -         | -         | 0.015 | 9.5e-4 | -  |
|            | ZOOpt     | -           | -         | -         | 0.013 | 4.3e-4 | -  |
|            | Hyperband | -           | ResNet50  | Adamax    | 0.075 | 1.5e-4 | 20 |
|            | BOHB      | -           | ResNet34  | Adadelata | 0.1   | 3.0e-4 | 12 |
|            | ASHA      | -           | ResNet34  | SGD       | 0.075 | 1.5e-4 | 20 |
|            | AME(Ours) | -           | ResNet34  | SGD       | 0.035 | 1.0e-5 | 12 |
| CLS (Cars) | PBT       | -           | -         | -         | 0.049 | 5.0e-5 | -  |
|            | PB2       | -           | -         | -         | 0.009 | 4.8e-4 | -  |
|            | BayesOpt  | -           | -         | -         | 0.013 | 5.8e-4 | -  |
|            | Dragonfly | -           | -         | -         | 0.019 | 9.2e-4 | -  |
|            | ZOOpt     | -           | -         | -         | 0.017 | 4.4e-5 | -  |
|            | Hyperband | -           | ResNet34  | Adagrad   | 0.025 | 3.5e-4 | 12 |
|            | BOHB      | -           | ResNet18  | SGD       | 0.095 | 9.0e-4 | 24 |
|            | ASHA      | -           | ResNet18  | SGD       | 0.075 | 0      | 32 |
|            | AME(Ours) | -           | ResNet34  | SGD       | 0.02  | 1.0e-5 | 12 |
| DET (VOC)  | PBT       | -           | -         | -         | 0.012 | 1.1e-4 | -  |
|            | PB2       | -           | -         | -         | 0.007 | 8.2e-4 | -  |
|            | BayesOpt  | -           | -         | -         | 0.015 | 7.6e-4 | -  |
|            | Dragonfly | -           | -         | -         | 0.014 | 2.6e-4 | -  |
|            | ZOOpt     | -           | -         | -         | 0.019 | 3.1e-5 | -  |
|            | Hyperband | RepPoints   | ResNeSt50 | SGD       | 0.004 | 3.0e-4 | 4  |
|            | BOHB      | CascadeRCNN | ResNeSt50 | Adadelata | 0.014 | 5.0e-5 | 12 |
|            | ASHA      | RepPoints   | ResNeSt50 | Adadelata | 0.007 | 3.5e-4 | 8  |
|            | AME(Ours) | RetineNet   | ResNeSt50 | SGD       | 0.007 | 1.0e-5 | 8  |
| SEG (VOC)  | PBT       | -           | -         | -         | 0.014 | 5.7e-4 | -  |
|            | PB2       | -           | -         | -         | 0.021 | 8.8e-4 | -  |
|            | BayesOpt  | -           | -         | -         | 0.019 | 5.2e-5 | -  |
|            | Dragonfly | -           | -         | -         | 0.012 | 1.8e-4 | -  |
|            | ZOOpt     | -           | -         | -         | 0.013 | 2.2e-5 | -  |
|            | Hyperband | PSPNet      | ResNet50  | Adadelata | 0.02  | 2.0e-4 | 12 |
|            | BOHB      | DANet       | ResNeSt50 | Adadelata | 0.005 | 9.0e-4 | 12 |
|            | ASHA      | PSANet      | ResNeXt50 | SGD       | 0.018 | 9.0e-4 | 12 |
|            | AME(Ours) | DANet       | ResNeXt50 | Adadelata | 0.016 | 1.0e-4 | 10 |

Table I. A set of examples of searched configurations. Since PBT, PB2, BayesOpt, Dragonfly, ZOOpt can not select head, backbone, optimizer and batch size, they adopt the default configuration (the best configuration given by AME).
